# Supplementary material for: One-Pot Isothermal LAMP-CRISPR-Based Assay for Klebsiella pneumoniae Detection
Source: PubMed Central journal article supplement (PMC9430409; doi:10.1128/spectrum.01545-22), 2022-07-20
Supplement: spectrum.01545-22-s0001.pdf [file spectrum.01545-22-s0001.pdf]

## Supplementary materials for one-pot, isothermal LAMP-CRISPR-based assay for *Klebsiella pneumoniae* detection

**Table S1.** Alternative LAMP primers designed in this study.

| Primer  | Type            |          | Sequence (5'-3') <sup>a</sup>                                 | Length <sup>b</sup> |
|---------|-----------------|----------|---------------------------------------------------------------|---------------------|
| Kp2-F3  | Forward primer  | outer    | CTATACCCGGTTGGGATTG                                           | 19 nt               |
| Kp2-B3  | Backward primer | outer    | AATGCCATTACTTTCATCATCA                                        | 22 nt               |
| Kp2-FIP | Forward primer  | inner    | AGCACTGTTGACCTCAACGA- <b>TTC</b> -<br>ACGGGATATCTGACCAGTC     | 42 nt               |
| Kp2-BIP | Backward primer | inner    | GCGGATCTGCAGAAACACTG-<br>CACGAAACAGTCTTCATTCA                 | 40 nt               |
| Kp2-LF  | Loop primer     | forward  | TCCTGTTTTTTAATTCCCC                                           | 19 nt               |
| Kp2-LB  | Loop primer     | backward | CGTCGTGTTGCCCGGCGGT                                           | 19 nt               |
| Kp3-F3  | Forward primer  | outer    | ATTGTCACTGAGTAAAACAGAA                                        | 22 nt               |
| Kp3-B3  | Backward primer | outer    | AGGTGATGTTTTTCGGTCAG                                          | 19 nt               |
| Kp3-FIP | Forward primer  | inner    | GCTTTGATGTTTCATTTGCGTTGAG- <b>TTC</b> -<br>TGCTGCAAATGTGGATGG | 45 nt               |
| Kp3-BIP | Backward primer | inner    | AAGACGGTATCGTCGCATAAA-<br>GAACGATATGATAAATCACCTGC             | 44 nt               |
| Kp3-LF  | Loop primer     | forward  | TGCGAAGTACCATGCCCGG                                           | 19 nt               |

<sup>a</sup> The inserted PAM site (TTC) was in bold. <sup>b</sup> nt, nucleotide.

**Table S2.** Bacterial strains used in this study.

| Bacteria                            | Strain type (Strain ID)          | No. of strains |
|-------------------------------------|----------------------------------|----------------|
| <i>Klebsiella pneumoniae</i>        | Reference strain (ATCC 700603)   | 1              |
|                                     | Isolated strain                  | 64             |
| <i>Klebsiella oxytoca</i>           | Isolated strain                  | 3              |
| <i>Klebsiella aerogenes</i>         | Isolated strain                  | 1              |
| <i>Staphylococcus aureus</i>        | Reference strain (ATCC 29213)    | 1              |
|                                     | Isolated strain                  | 2              |
| <i>Staphylococcus haemolyticus</i>  | Isolated strain                  | 1              |
| <i>Staphylococcus succinus</i>      | Isolated strain                  | 1              |
| <i>Staphylococcus epidermidis</i>   | Isolated strain                  | 1              |
| <i>Acinetobacter baumannii</i>      | Isolated strain                  | 1              |
| <i>Acinetobacter pizzeri</i>        | Isolated strain                  | 1              |
| <i>Acinetobacter junii</i>          | Isolated strain                  | 1              |
| <i>Pseudomonas aeruginosa</i>       | Reference strain (ATCC 27853)    | 1              |
| <i>Haemophilus influenzae</i>       | Reference strain (ATCC 49247)    | 1              |
| <i>Moraxella catarrhalis</i>        | Isolated strain                  | 1              |
| <i>Escherichia coli</i>             | Reference strain (ATCC 25922)    | 1              |
| <i>Mycobacterium tuberculosis</i>   | Reference strain (H37Rv)         | 1              |
| <i>Streptococcus pneumoniae</i>     | Reference strain (ATCC 49619)    | 1              |
| <i>Streptococcus oralis</i>         | Isolated strain                  | 1              |
| <i>Streptococcus salivarius</i>     | Reference strain (K12)           | 1              |
| <i>Streptococcus agalactiae</i>     | Isolated strain                  | 1              |
| <i>Streptococcus pyogenes</i>       | Reference strain (CGMC 48848)    | 1              |
| <i>Streptococcus mitis</i>          | Isolated strain                  | 1              |
| <i>Streptococcus suis</i>           | Reference strain (GZ1)           | 1              |
| <i>Stenotrophomonas maltophilia</i> | Isolated strain                  | 1              |
| <i>Nocardia farcinica</i>           | Reference strain (IFM 10152)     | 1              |
| <i>Nocardia cyriacigeorgica</i>     | Reference strain (DSM 40350)     | 1              |
| <i>Rhodococcus sp.</i>              | Isolated strain                  | 1              |
| <i>Streptomyces sp.</i>             | Isolated strain                  | 1              |
| <i>Corynebacterium striatum</i>     | Reference strain (ATCC 43751)    | 1              |
| <i>Corynebacterium simulans</i>     | Isolated strain                  | 1              |
| <i>Corynebacterium propinquum</i>   | Isolated strain                  | 1              |
| <i>Corynebacterium aurimucosum</i>  | Isolated strain                  | 1              |
| <i>Clostridium difficile</i>        | Reference strain (ATCC BAA-1803) | 1              |
| <i>Enterococcus faecalis</i>        | Reference strain (ATCC 29212)    | 1              |
| <i>Aeromonas caviae</i>             | Isolated strain                  | 1              |
| <i>Elizabethkingia anophelis</i>    | Isolated strain                  | 1              |
| <i>Ralstonia mannitolilytica</i>    | Isolated strain                  | 1              |
| <i>Rothia kristinae</i>             | Isolated strain                  | 1              |
| <i>Serratia marcescens</i>          | Isolated strain                  | 1              |

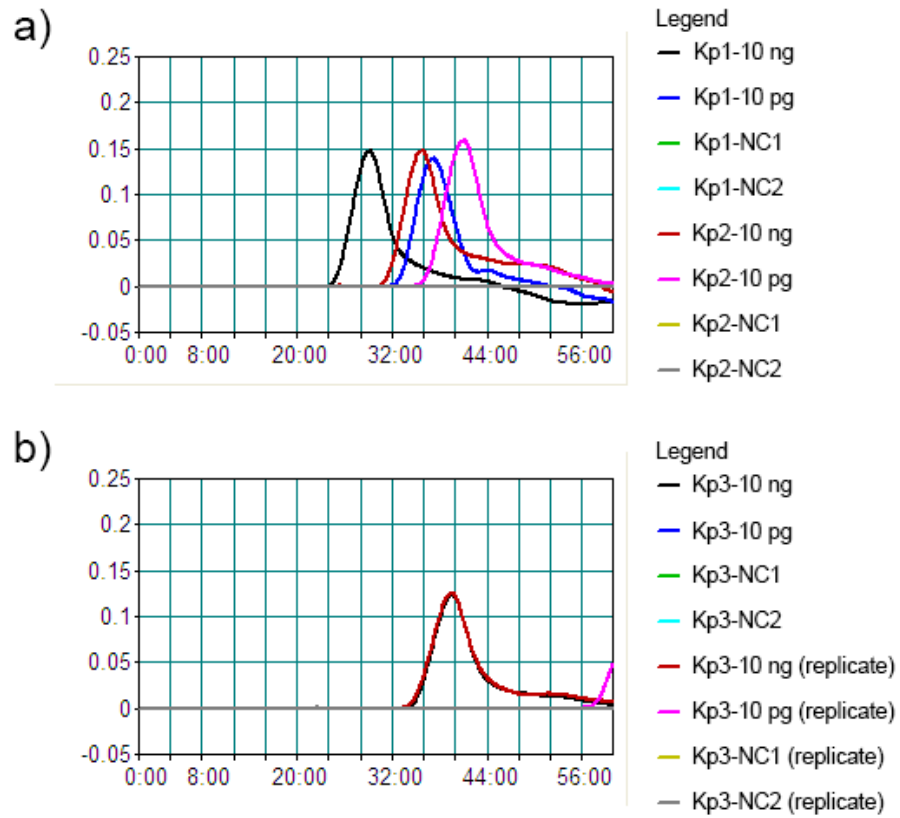

**Figure S1.** Primer sets screening and confirmation. LAMP detection was conducted at 59 °C for 1 h. **a)** Primer set Kp1 and Kp2. **b)** Primer set Kp3.

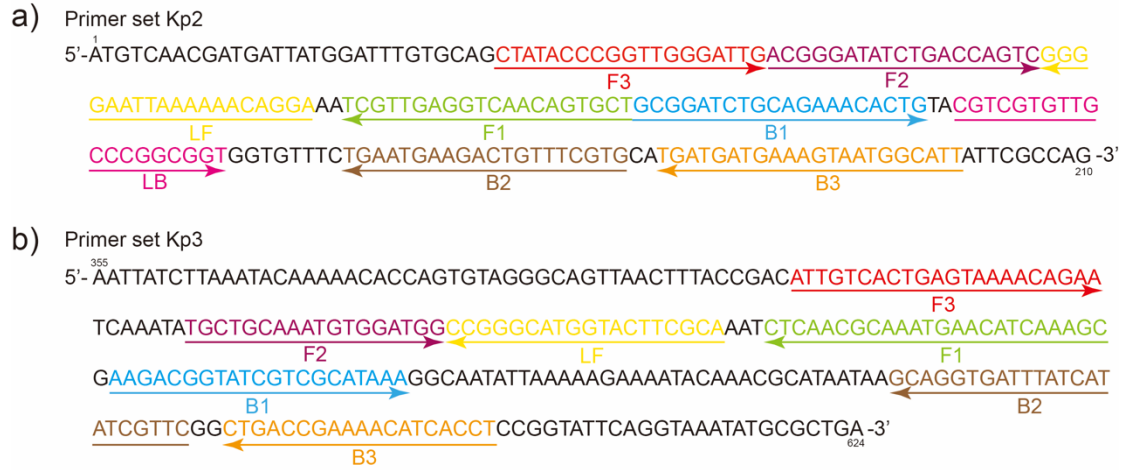

**Figure S2.** The primer set Kp2 and Kp3 design regions. A part of the *rcsA* sequence was shown. Right-pointing arrows and left-pointing arrows indicate sense and complementary strands respectively. **a)** Primer set Kp2. **b)** Primer set Kp3.

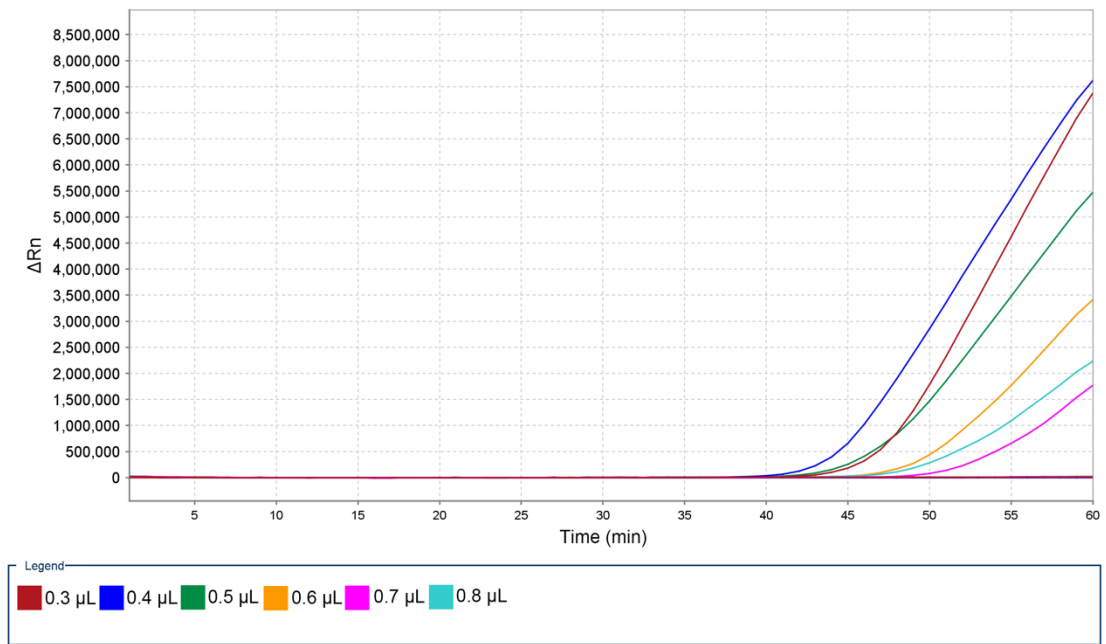

**Figure S3.** Optimal primer pre-mixture volume of the *K. pneumoniae* CRISPR-top assay. *K. pneumoniae* ATCC 700603 genomic DNA and DW were used as the templates of the positive control and the negative control respectively. PC, positive control; NC, negative control.

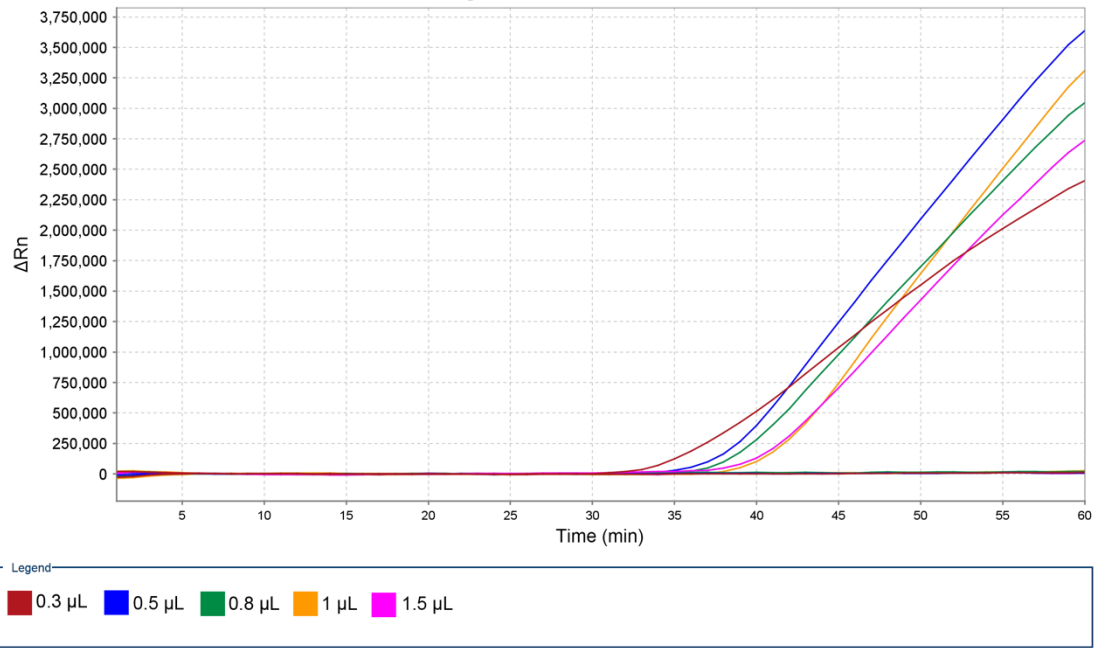

**Figure S4.** Optimal ssDNA probe concentration of the *K. pneumoniae* CRISPR-top assay. *K. pneumoniae* ATCC 700603 genomic DNA and DW were used as the templates of the positive control and the negative control respectively. PC, positive control; NC, negative control.
